# Supplementary material for: Effect of methylation on the coordination of copper by small azacryptands; the role of geometrically constrained hydrogen bonding in stabilizing terminally coordinated oxygen species
Source: Royal Society of Chemistry journal article supplement (doi:10.1039/b602003h), 2006-01-01

## Supplementary magnetic and ESR data

### ESR Spectrum of complex 2a

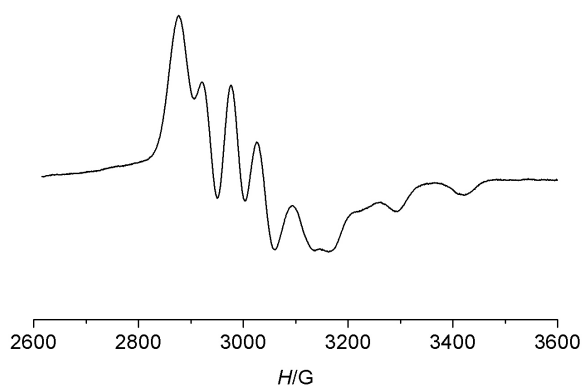

### ESR Spectrum of complex 2b

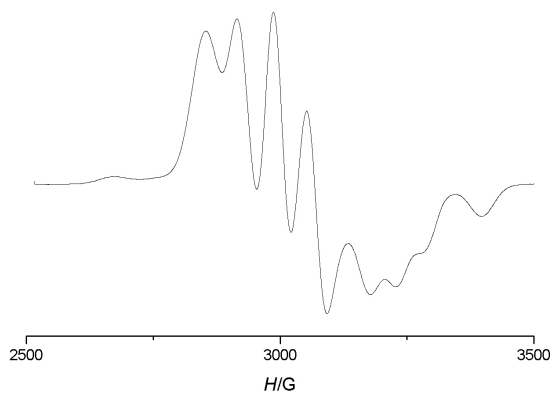

### Magnetic Data for Complex 4b

Plot of the temperature dependence of magnetic susceptibility fitted to the Bleaney-Bowers' equation with parameters:  $-2J = (40 \pm 5) \text{ cm}^{-1}$ ;  $g = 2.0$ ; TIP set at  $60 \times 10^{-6} \text{ cm}^3 \text{ mol}^{-1}$ .

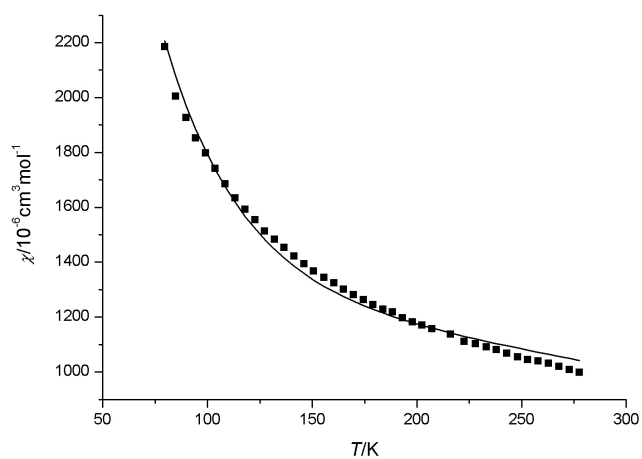

Supplement: b602003h.pdf [file b602003h.pdf]
